# Supplementary material for: Somatic Morbidity in Bipolar Disorders
Source: Research Square preprint supplement (doi:10.21203/rs.3.rs-8051247/v1), 2025-12-22
Supplement: Supplementary file 1 [file ce0cc19370d2dc130bba9639.docx]

# Supplementary material

**Supplementary table 1.** Sociodemographic characteristics of the study population.

|  | **Bipolar disorder all**  **n (%)** | **Not having bipolar disorder n (%)** | **Women with bipolar disorder n (%)** | **Women not having bipolar disorder  n (%)** | **Men with bipolar disorder n (%)** | **Men not having bipolar disorder  n (%)** |
| --- | --- | --- | --- | --- | --- | --- |
| **Sex** | | | | | | |
| Women | 38 157 (63 %) | 3 834 165 (49 %) | NA | NA | NA | NA |
| **Highest educational level of parent** | | | | | | |
| Compulsory school1 | 13 787 (23 %) | 1 697 895 (21 %) | 16 137 (21 %) | 825 922 (21 %) | 5 691 (21 %) | 871 973 (21 %) |
| Upper secondary school | 26 463 (43 %) | 3 077 370 (39 %) | 16,999 (45 %) | 1 491 385 (39 %) | 9 464 (41 %) | 1 585 985 (39 %) |
| University or higher | 20 821 (34 %) | 3 136 755 (40 %) | 13 062 (34 %) | 1 516 858 (40 %) | 7 759 (34 %) | 1 619 897 (40 %) |
| Total | 61 071 | 7 912 020 | 38 157 | 3 834 165 | 22 914 | 4 077 855 |
|  | **Having bipolar I disorder n (%)** | **Not having bipolar I disorder (%)** | **Having bipolar II disorder n (%)** | **Not having bipolar II disorder n (%)** | **Bipolar disorder with compulsory care n (%)** | **Bipolar disorder outpatient care  n (%)** |
| **Sex** | | | | | | |
| Women | 4 903 (59 %) | 3 834 061 (49 %) | 5 151 (69 %) | 3 833 907 (49 %) | 298 (55 %) | 27 432 (64 %) |
| **Highest educational level of parent** | | | | | | |
| Compulsory school1 | 2 012 (24 % ) | 1 697 865 (21 %) | 1 332 (18 %) | 1 697 848 (21 %) | 129 (24 %) | 8178 (19 %) |
| Upper secondary school | 3 278 (39 %) | 3 0 77 300 (39 %) | 3 278 (44 %) | 3 077 206 (39 %) | 223 (41 %) | 19 068 (44 %) |
| University or higher | 3 062 (37 %) | 3 136 660 (40 %) | 2 862 (38 %) | 3 136 577 (40 %) | 195 (35 %) | 15 755 (37 %) |
| Total | 8 352 | 7 911 825 | 7 512 | 7 911 631 | 547 | 43 001 |

1 9 years of schooling or less; NA= Not applicable

**Supplementary table 2.** Associations between bipolar disorder and somatic outcomes. Results presented as hazard ratios (HR) with 95% confidence intervals adjusted for parental highest educational level and year of birth. HRs compare individuals with bipolar disorder (N= 61,071; women n=38,157) to individuals without bipolar disorder diagnosis (N= 7,912,020; women n=3,834,165) and those who experienced compulsory care (n=6,748; women n=3,801) separately.

| **Outcomes** | **All with bipolar disorder**  **HR (95% CI)** | **Men with bipolar disorder**  **HR (95% CI)** | **Women with bipolar disorder HR (95% CI)** | **All with bipolar disorder and compulsory care  HR (95% CI)** | **Men with bipolar disorder and compulsory care  HR (95% CI)** | **Women with bipolar disorder and compulsory care HR (95% CI)** |
| --- | --- | --- | --- | --- | --- | --- |
| **Cardiovascular conditions** | | | |  |  |  |
| Any cardiovascular disease | 1.45 (1.42–1.48) | 1.39 (1.35–1.43) | 1.59 (1.54–1.63) | 1.65 (1.56–1.74) | 1.57 (1.45–1.70) | 1.79 (1.66–1.94) |
| Hyperlipidemia | 1.29 (1.24–1.34) | 1.22 (1.16–1.29) | 1.51 (1.42–1.59) | 1.22 (1.09–1.36) | 1.24 (1.07–1.45) | 1.25 (1.06–1.48) |
| Hypertensive diseases | 1.41 (1.38–1.44) | 1.38 (1.33–1.42) | 1.50 (1.45–1.55) | 1.65 (1.55–1.75) | 1.65 (1.52–1.80) | 1.64 (1.51–1.79) |
| Arteriosclerosis | 1.29 (1.21–1.36) | 1.19 (1.09–1.30) | 1.43 (1.32–1.55) | 1.12 (0.93–1.34) | 1.15 (0.90–1.48) | 1.11 (0.85–1.44) |
| Peripheral artery disease | 2.06 (1.99–2.12) | 1.91 (1.82–2.00) | 2.39 (2.29–2.50) | 2.52 (2.33–2.73) | 2.18 (1.94–2.46) | 2.96 (2.65–3.30) |
| Ischemic heart disease | 1.25 (1.20–1.30) | 1.19 (1.13–1.26) | 1.56 (1.47–1.66) | 1.17 (1.04–1.32) | 1.13 (0.96–1.32) | 1.38 (1.15–1.66) |
| Arrhythmias | 1.21 (1.16–1.25) | 1.16 (1.10–1.22) | 1.38 (1.31–1.46) | 1.55 (1.41–1.70) | 1.42 (1.25–1.62) | 1.84 (1.62–2.10) |
| Heart failure | 1.64 (1.56–1.72) | 1.58 (1.48–1.69) | 1.91 (1.78–2.05) | 2.12 (1.88–2.40) | 1.85 (1.55–2.20) | 2.71 (2.29–3.22) |
| Thromboembolic disease | 1.70 (1.64–1.77) | 1.65 (1.55–1.75) | 1.71 (1.62–1.80) | 2.34 (2.12–2.58) | 2.22 (1.91–2.58) | 2.35 (2.07–2.67) |
| **Infectious, inflammatory or autoimmune conditions** | | | |  |  |  |
| Bacterial infection | 1.79 (1.77–1.82) | 1.51 (1.48–1.55) | 1.77 (1.75–1.79) | 1.87 (1.81–1.94) | 1.72 (1.63–1.83) | 1.79 (1.72–1.87) |
| Viral infection | 1.63 (1.60–1.67) | 1.61 (1.56–1.67) | 1.62 (1.58–1.66) | 1.88 (1.78–1.99) | 1.73 (1.59–1.90) | 1.86 (1.73–2.00) |
| COVID-19 infection | 1.86 (1.71–2.03) | 1.73 (1.50–1.99) | 1.90 (1.70–2.12) | 2.39 (1.92–2.97) | 2.62 (1.90–3.62) | 2.20 (1.63–2.96) |
| Autoimmune disease | 1.46 (1.43–1.50) | 1.43 (1.37–1.50) | 1.38 (1.34–1.42) | 1.47 (1.37–1.58) | 1.41 (1.25–1.59) | 1.39 (1.27–1.51) |
| Asthma | 1.68 (1.64–1.72) | 1.42 (1.35–1.48) | 1.79 (1.74–1.85) | 1.68 (1.55–1.81) | 1.22 (1.06–1.40) | 1.87 (1.70–2.04) |
| Type 1 diabetes NPR | 1.47 (1.40–1.54) | 1.51 (1.41–1.63) | 1.51 (1.41–1.63) | 1.72 (1.50–1.98) | 1.79 (1.48–2.16) | 1.67 (1.37–2.04) |
| Type 1 diabetes NDR | 1.06 (0.98–1.14) | 1.20 (1.07–1.34) | 1.01 (0.91–1.13) | 1.05 (0.83–1.33) | 1.36 (1.01–1.83) | 0.75 (0.50–1.10) |
| Type 2 diabetes NDR | 1.80 (1.75–1.85) | 1.66 (1.59–1.73) | 2.12 (2.04–2.21) | 2.09 (1.94–2.26) | 1.68 (1.50–1.89) | 2.59 (2.34–2.87) |
| **Neurological conditions** | | | |  |  |  |
| Alzheimer disease | 3.82 (3.54–4.11) | 4.00 (3.57–4.48) | 3.64 (3.30–4.02) | 7.22 (6.19–8.46) | 7.87 (6.16–10.06) | 6.70 (5.44–8.25) |
| Other dementias | 4.23 (3.81–4.69) | 4.26 (3.68–4.92) | 4.48 (3.87–5.20) | 6.93 (5.49–8.74) | 7.09 (5.10–9.85) | 7.39 (5.31–10.27) |
| Epilepsy | 2.16 (2.07–2.25) | 2.25 (2.11–2.39) | 2.16 (2.04–2.28) | 2.96 (2.67–3.28) | 3.01 (2.59–3.50) | 3.10 (2.69–3.56) |
| Migraine | 2.04 (1.98–2.12) | 1.74 (1.60–1.88) | 1.83 (1.76–1.90) | 1.56 (1.39–1.76) | 1.57 (1.24–1.98) | 1.41 (1.23–1.61) |
| Sleep disorders | 3.81 (3.73–3.89) | 3.17 (3.07–3.28) | 5.15 (5.00–5.30) | 4.66 (4.40–4.94) | 3.70 (3.39–4.03) | 6.34 (5.87–6.85) |
| Cerebrovascular disease | 1.59 (1.53–1.65) | 1.56 (1.48–1.65) | 1.69 (1.60–1.77) | 1.67 (1.51–1.84) | 1.80 (1.57–2.07) | 1.59 (1.38–1.84) |
| **Other somatic conditions** | | | |  |  |  |
| Polycystic ovary syndrome | N/A | N/A | 1.70 (1.60–1.81) | N/A | N/A | 1.88 (1.54–2.30) |
| Obesity | 2.56 (2.49–2.62) | 2.25 (2.13–2.37) | 2.26 (2.20–2.32) | 2.52 (2.34–2.71) | 2.39 (2.08–2.76) | 2.06 (1.89–2.26) |
| Restless legs syndrome | 3.38 (3.04–3.77) | 3.03 (2.49–3.70) | 3.31 (2.91–3.76) | 3.00 (2.16–4.16) | 3.34 (1.98–5.64) | 2.64 (1.74–4.01) |
| Irritable bowel syndrome | 2.55 (2.45–2.66) | 2.10 (1.91–2.32) | 2.30 (2.20–2.41) | 1.83 (1.58–2.12) | 1.54 (1.12–2.11) | 1.74 (1.48–2.05) |
| Fibromyalgia | 3.82 (3.62–4.03) | 4.50 (3.51–5.77) | 3.10 (2.93–3.27) | 2.18 (1.78–2.67) | 3.10 (1.39–6.92) | 1.64 (1.33–2.02) |
| Chronic fatigue syndrome | 2.88 (2.43–3.42) | 2.35 (1.58–3.49) | 2.66 (2.20–3.21) | 1.54 (0.77–3.08) | 2.21 (0.71–6.85) | 1.23 (0.51–2.95) |

Abbreviations: N/A=not applicable; NPR=The National Patient Register; NDR=The National Diabetes Register.

**Supplementary table 3.** Time-varying model considering date of first diagnosis as start of exposure to bipolar disorder. Individuals born 1932 or later with bipolar disorder (N= 61,071; women n=38,157) and without bipolar disorder (N= 7,912,020; women n=3,834,165). Results presented as hazard ratios (HR) with 95% confidence intervals adjusted for highest educational level and year of birth. Not including COVID-19.

| **Outcomes** | **All**  **HR (95% CI)** Adjusted for educational level and birth year | **Men**  **HR (95% CI)** Adjusted for educational level and birth year | **Women HR (95% CI)** Adjusted for educational level and birth year |
| --- | --- | --- | --- |
| **Cardiovascular conditions** | | | |
| Cardiovascular disease | 1.47 (1.43–1.51) | 1.42 (1.37–1.48) | 1.62 (1.56–1.68) |
| Hyperlipidemia | 1.18 (1.13–1.23) | 1.12 (1.05–1.19) | 1.37 (1.28–1.46) |
| Hypertensive diseases | 1.28 (1.24–1.31) | 1.24 (1.19–1.30) | 1.35 (1.30–1.41) |
| Arteriosclerosis | 1.27 (1.19–1.37) | 1.21 (1.10–1.34) | 1.41 (1.27–1.55) |
| Peripheral artery disease | 2.22 (2.14–2.30) | 2.00 (1.89–2.11) | 2.68 (2.54–2.82) |
| Ischemic heart disease | 1.22 (1.16–1.28) | 1.16 (1.08–1.24) | 1.52 (1.41–1.64) |
| Arrhythmias | 1.20 (1.15–1.25) | 1.15 (1.08–1.22) | 1.38 (1.30–1.47) |
| Heart failure | 1.75 (1.66–1.84) | 1.64 (1.52–1.77) | 2.09 (1.93–2-26) |
| Thromboembolic disease | 1.69 (1.61–1.78) | 1.68 (1.56–1.81) | 1.68 (1.57–1.79) |
| **Infectious, inflammatory, or autoimmune conditions** | | | |
| Bacterial infection | 1.75 (1.72–1.79) | 1.57 (1.51–1.62) | 1.67 (1.63–1.71) |
| Viral infection | 1.73 (1.67–1.79) | 1.65 (1.56–1.75) | 1.70 (1.63–1.77) |
| Autoimmune disease | 1.49 (1.44–1.54) | 1.45 (1.37–1.55) | 1.37 (1.31–1.43) |
| Asthma | 1.63 (1.55–1.70) | 1.24 (1.13–1.36) | 1.65 (1.57–1.74) |
| Type 1 diabetes (NPR) | 1.60 (1.47–1.74) | 1.55 (1.37–1.75) | 1.79 (1.59–2.01) |
| Type 1 diabetes (NDR) | 0.71 (0.61–0.82) | 0.85 (0.69–1.05) | 0.64 (0.52–0.80) |
| Type 2 diabetes (NDR) | 1.78 (1.72–1.83) | 1.66 (1.58–1.74) | 2.05 (1.96–2.14) |
| **Neurological conditions** | | | |
| Alzheimer disease | 3.87 (3.58–4.19) | 4.08 (3.61–4.61) | 3.67 (3.31–4.08) |
| Other dementias | 4.24 (3.79–4.75) | 4.29 (3.67–5.03) | 4.47 (3.80–5.26) |
| Epilepsy | 3.14 (2.95–3.34) | 3.28 (3.00–3.59) | 3.09 (2.84–3.36) |
| Migraine | 1.72 (1.63–1.81) | 1.28 (1.12–1.47) | 1.52 (1.43–1.61) |
| Sleep disorders | 3.70 (3.60–3.80) | 2.98 (2.85–3.11) | 5.02 (4.85–5.21) |
| Cerebrovascular diseases | 1.66 (1.59–1.73) | 1.62 (1.52–1.72) | 1.77 (1.66–1.87) |
| **Other somatic conditions** | | | |
| Polycystic ovary syndrome | N/A | 1.50 (1.37–1.65) | N/A |
| Obesity | 2.34 (2.27–2.42) | 2.24 (2.09–2.40) | 1.90 (1.83–1.98) |
| Restless legs syndrome | 2.80 (2.44–3.22) | 2.35 (1.80–3.06) | 2.79 (2.37–3.28) |
| Irritable bowel syndrome | 2.06 (1.93–2.19) | 1.40 (1.93–1.65) | 1.89 (1.77–2.02) |
| Fibromyalgia | 3.20 (3.00–3.41) | 4.05 (3.03–5.42) | 2.44 (2.28–2.61) |
| Chronic fatigue syndrome | 2.88 (2.31–3.58) | 2.53 (1.52–4.21) | 2.52 (1.98–3.21) |

Abbreviations: N/A=not applicable; NPR=The National Patient Register; NDR=The National Diabetes Register.

**Supplementary table 4.** Sensitivity analysis considering only main diagnosis of each outcome. Individuals born 1932 or later with bipolar disorder (N= 61,071; women n=38,157) and without bipolar disorder (N= 7,912,020; women n=3,834,165). Results presented as hazard ratios (HR) with 95% confidence intervals adjusted for highest educational level and year of birth. Not including COVID-19.

| **Outcomes** | **All**  **HR (95% CI)** Adjusted for educational level and birth year | **Men**  **HR (95% CI)** Adjusted for educational level and birth year | **Women HR (95% CI)** Adjusted for educational level and birth year |
| --- | --- | --- | --- |
| **Cardiovascular conditions** | | | |
| Cardiovascular disease | 1.36 (1.33–1.39) | 1.31 (1.27–1.36) | 1.49 (1.45–1.54) |
| Hyperlipidemia | 1.15 (1.02–1.30) | 1.26 (1.07–1.48) | 1.13 (0.94–1.34) |
| Hypertensive diseases | 1.18 (1.13–1.24) | 1.16 (1.09–1.24) | 1.24 (1.17–1.32) |
| Arteriosclerosis | 1.25 (1.17–1.34) | 1.19 (1.08–1.31) | 1.37 (1.24–1.50) |
| Peripheral artery disease | 1.89 (1.81–1.97) | 1.80 (1.69–1.91) | 2.17 (2.04–2.31) |
| Ischemic heart disease | 1.15 (1.10–1.20) | 1.11 (1.04–1.18) | 1.42 (1.33–1.53) |
| Arrhythmias | 1.07 (1.03–1.12) | 1.02 (0.96–1.08) | 1.23 (1.16–1.30) |
| Heart failure | 1.55 (1.45–1.65) | 1.57 (1.44–1.70) | 1.72 (1.57–1.89) |
| Thromboembolic disease | 1.69 (1.62–1.77) | 1.65 (1.54–1.76) | 1.69 (1.59–1.78) |
| **Infectious, inflammatory, or autoimmune conditions** | | | |
| Bacterial infection | 1.77 (1.75–1.79) | 1.49 (1.45–1.52) | 1.77 (1.74–1.79) |
| Viral infection | 1.60 (1.57–1.64) | 1.59 (1.53–1.65) | 1.59 (1.54–1.63) |
| Autoimmune disease | 1.39 (1.35–1.43) | 1.36 (1.30–1.43) | 1.30 (1.26–1.34) |
| Asthma | 1.50 (1.46–1.55) | 1.34 (1.27–1.41) | 1.60 (1.55–1.66) |
| Type 1 diabetes | 1.25 (1.17–1.33) | 1.28 (1.17–1.40) | 1.30 (1.19–1.41) |
| **Neurological conditions** | | | |
| Alzheimer disease | 3.12 (2.82–3.44) | 3.34 (2.87–3.89) | 2.91 (2.55–3.31) |
| Other dementias | 4.11 (3.57–4.73) | 4.03 (3.31–4.91) | 4.50 (3.68–5.50) |
| Epilepsy | 2.01 (1.92–2.11) | 2.11 (1.97–2.26) | 2.00 (1.88–2.12) |
| Migraine | 1.96 (1.89–2.04) | 1.69 (1.54–1.85) | 1.76 (1.68–1.84) |
| Sleep disorders | 3.09 (3.01–3.17) | 2.67 (2.56–2.77) | 4.31 (4.15–4.47) |
| Cerebrovascular diseases | 1.45 (1.39–1.50) | 1.40 (1.33–1.49) | 1.55 (1.47–1.63) |
| **Other somatic conditions** | | | |
| Polycystic ovary syndrome | N/A | 1.77 (1.65–1.91) | N/A |
| Obesity | 2.90 (2.81–3.00) | 2.21 (2.05–2.39) | 2.72 (2.63–2.82) |
| Restless legs syndrome | 2.79 (2.40–3.24) | 2.53 (1.93–3.33) | 2.73 (2.28–3.28) |
| Irritable bowel syndrome | 2.46 (2.35–2.58) | 2.06 (1.85–2.30) | 2.22 (2.11–2.34) |
| Fibromyalgia | 3.76 (3.49–4.06) | 4.35 (3.07–6.15) | 2.98 (2.76–3.23) |
| Chronic fatigue syndrome | 2.51 (2.04–3.09) | 1.97 (1.22–3.18) | 2.35 (1.87–2.96) |

Abbreviations: N/A=not applicable; NPR=The National Patient Register; NDR=The National Diabetes Register.

**Supplementary table 5.** Definitions of diagnostic codes included under each outcome.

| **Outcomes** | **Codes** (according to The International Classification of Diseases (ICD)) |
| --- | --- |
| Cardiovascular disease | **ICD-8**: 400, 401, 402, 403, 404, 410, 411, 412, 413, 414, 428, 430, 431, 432, 433, 434, 436, 437, 438, 440, 441, 442, 443, 444, 450, 451  **ICD 9:** 401, 402, 403, 404, 405, 410, 411, 412, 413, 414, 426B, 427, 428, 430, 431, 432, 433, 434, 436, 437, 438, 440, 441, 442, 443, 444, 451  **ICD 10:** I20, I21, I22, I23, I24, I25, I26, I42, I441, I442, I46, I470, I471, I472, I48, I490, I495, I498, I50, I6, I70, I71, I72, I73, I74, I80 |
| Hyperlipidemia | **ICD 8:** 279 **ICD 9:** 272 **ICD 10:** E78 |
| Hypertensive diseases | **ICD 8:** 400, 401, 402, 403, 404 **ICD 9:** 401, 402, 403, 404, 405 **ICD 10:** I1 |
| Arteriosclerosis | **ICD 8:** 440, 441, 442, 443, 444 **ICD 9:** 440, 441, 441, 442, 443, 444 **ICD 10:** I70, I71, I72, I73, I74 |
| Peripheral artery disease | **ICD 8:** 250 **ICD 9:** 250 **ICD 10:** E11 |
| Ischemic heart diseases | **ICD 8:** 410, 411, 412, 413, 414 **ICD 9:** 410, 411, 412, 413, 414 **ICD 10:** I20 I21 I22 I23 I24 I251  I252 I255 I256 I258 I259 |
| Arrhythmias | **ICD 8:** - **ICD 9:** 426A, 426B, 427A, 427B,  427D, 427E, 427F, 427W **ICD 10:** I441, I442, I46, I470, I471, I472, I48, I490, I495, I498 |
| Heart failure | **ICD 8:** 428 **ICD 9:** 428 **ICD 10:** I50, I42 |
| Cerebrovascular diseases | **ICD 8:** 43 **ICD 9:** 43 **ICD 10:** I6, G45 |
| Thromboembolic disease | **ICD 8:** 450, 451 **ICD 9:** 415B, 451B **ICD 10:** I26, I80 |
| Bacterial infections | **ICD 8:** - **ICD 9:** 001, 002, 003, 004, 005, 008A, 008B, 008C, 008D, 008E, 008F, 01, 02, 030, 031, 032, 033, 034B, 035, 036, 037, 038, 039, 041, 073, 076, 077A, 078D, 078J, 080, 081, 082, 083, 087, 091, 092, 093, 094, 095, 096, 097, 098, 099A, 099B, 099C, 100, 101, 102, 103, 104, 320, 324, 325, 326, 382, 390, 391, 475, 481, 482, 510, 513, 540, 541, 542, 590, 595, 597A, 599A, 614, 615, 616, 646F, 646G, 68, 711A, 711E, 790H **ICD 10:** A00, A01, A02, A03, A04, A05, A1, A2, A30, A31, A32, A34, A35, A36, A37, A38, A39, A4, A51, A52, A53, A54, A55, A56, A57, A58, A65, A66, A67, A68, A69, A7, B95, B96, G00, G01, G042, G050, G06, G07, G08, G09, H66, H670, I00, I01, J13, J14, J15, J170, J200, J201, J202, J36, J390, J391, J85, J86, K35, K36, K37, L0, M00, M010, M011, M012, M013, N10, N11, N12, N30, N340, N390, N7, O23 |
| Viral infections | **ICD 8:** - **ICD 9:** 466A, 466B, 478B, 478C **ICD 10:** J200, J201, J202, J390, J391 |
| COVID-19 | **ICD 10:** G258 |
| Any autoimmune disease | **ICD 8:** 0341, 13607, 24200, 24503, 26910, 28700, 28710, 25810, 390, 391, 392, 340, 35401, 44609, 44630, 44638, 44640, 56300,  56310, 57190, 580, 582, 694, 69610, 69619, 69620, 69621, 69622, 69623, 70400, 71200, 71210, 71239, 71600, 73300, 73400, 73410 **ICD 9:** 034B, 136B, 242A, 245C, 258B, 287A, 287D, 340, 357A, 358A, 390, 391, 392, 446A, 446B, 446F, 446G, 555, 580, 582, 556, 571F, 579A, 694A, 694E, 694F, 696, 710A, 710B, 710C, 704A, 710D, 710W, 714A, 725 **ICD 10:** A389, D686, D690, D693, E050, E063, E310, G04, G131, G35, G610, G700, I00, I01, I02, L100, L120, L13, L40, L63, K900, K50, K51, K743, M06, M300, M301, M32, M311, M315, M339, M34, M350, M352, M353, N00, N01, N03, N05, M303, M317, M351 |
| Asthma | **ICD 8:** 493 **ICD 9:** 493 **ICD 10:** J45, J46 |
| Type 1 diabetes | **ICD 8:** 250 **ICD 9:** 250 **ICD 10:** E10 |
| Alzheimer disease | **ICD 8:** 290 **ICD 9:** 290A, 290B, 290X, 331A **ICD 10:** F00, F03, G30 |
| Other dementias | **ICD 8:** 2930, 2931 **ICD 9:** 290E, 290W, 294B, 331B, 331C, 331X **ICD 10:** F01, F02, F05.1, G31.1, G31.8 |
| Epilepsy | **ICD 8:** 345 **ICD 9:** 345 **ICD 10:** G40, G41 |
| Migraine | **ICD 8:** 346.09 **ICD 9:** 346A, 346B, 346W, 346X **ICD 10:** G43 |
| Polycystic ovary syndrome | **ICD 8: - ICD 9:** 256E **ICD 10:** E282 |
| Obesity | **ICD 8:** 277 **ICD 9:** 278A, 278B **ICD 10:** E65, E66 |
| Restless legs syndrome | **ICD 8: - ICD 9: -**  **ICD 10:** G258 |
| Irritable bowel syndrome | **ICD 8: - ICD 9: - ICD 10:** K58 |
| Sleep disorders | **ICD 8:** 306.40 **ICD 9:** 307E, 780F **ICD 10:** G47 |
| Fibromyalgia | **ICD 8:** - **ICD 9:** - **ICD 10:** G258 |
| Chronic fatigue syndrome | **ICD 8:** - **ICD 9: - ICD 10:** G933 |

**Supplementary figure 1.** Flow chart of main cohort.

All individuals born 1932 or later.

N=17,468,371

Excluded:

- Individuals born before 1932. n=4,716,391
- Those who immigrated after 1973. n=2,948,715

- Those who emigrated before 1973. n=243,280
- Those who died before 1973 (start of follow-up). n=72,495

- No information of mother. n=484,448

- Follow-up restriction to Dec 31st, 2020. n=114,521

N=8,273,276

Individuals born 1932 or later who were alive and resident in Sweden at start of follow-up in 1973, or born later.

N= 9,003,042

N=

Excluded:

- Individuals with one bipolar disorder diagnosis only: n=20,304

- Only diagnoses of ICD-8 296.20 or ICD-9 296.B: (n=2,423)

- Individuals without bipolar disorder with any diagnosis of schizophrenia. (n=11, 650)

- Missing information on parental educational level. n=881,053

Final cohort.

N= 7,973,091

N=

Men

N=4,100,769

N=

Women

N=3,872,322

N=
